# Supplementary material for: Comparison of rhenium–porphyrin dyads for CO2 photoreduction: photocatalytic studies and charge separation dynamics studied by time-resolved IR spectroscopy
Source: PubMed Central journal article supplement (PMC5947513; doi:10.1039/c5sc02099a), 2015-08-20
Supplement: SC-006-C5SC02099A-s001.pdf [file SC-006-C5SC02099A-s001.pdf]

Supporting information for:

**Comparison of rhenium-porphyrin dyads for CO<sub>2</sub> photoreduction:  
photocatalytic studies and charge separation dynamics studied by  
time-resolved IR spectroscopy**

Christopher D. Windle,<sup>a</sup> Michael W. George,<sup>b,c\*</sup> Robin N. Perutz,<sup>a\*</sup> Peter A. Summers,<sup>b,c</sup> Xue Zhong Sun,<sup>b</sup> and Adrian C. Whitwood<sup>a</sup>

(a) Department of Chemistry, University of York, Heslington, York, YO10 5DD, U.K.

(b) School of Chemistry, University of Nottingham, Nottingham, NG7 2RD, U.K.

(c) Department of Chemical and Environmental Engineering, The University of Nottingham Ningbo China, Ningbo, 315100, China

\*Corresponding author. Email: robin.perutz@york.ac.uk,  
mike.george@nottingham.edu.cn

Primary data will be made available at DOI: 10.15124/4335e576-3737-4968-841b-076f8a4658ca

Table of contents

|                                                            |     |
|------------------------------------------------------------|-----|
| NMR spectra and assignments                                | S1  |
| Mass spectrometry of [ <b>Dyad 3 pic</b> ]OTf              | S8  |
| Cyclic voltammetry                                         | S9  |
| Crystallographic data                                      | S10 |
| Emission spectra                                           | S13 |
| TON plot for [ <b>Dyad 2 pic</b> ]OTf and <b>Dyad 2 Br</b> | S15 |
| Characterisation of hydrogenated porphyrin                 | S16 |
| IR spectra of ligand substitution                          | S17 |
| Dynamics in UV/vis spectra during catalysis                | S20 |

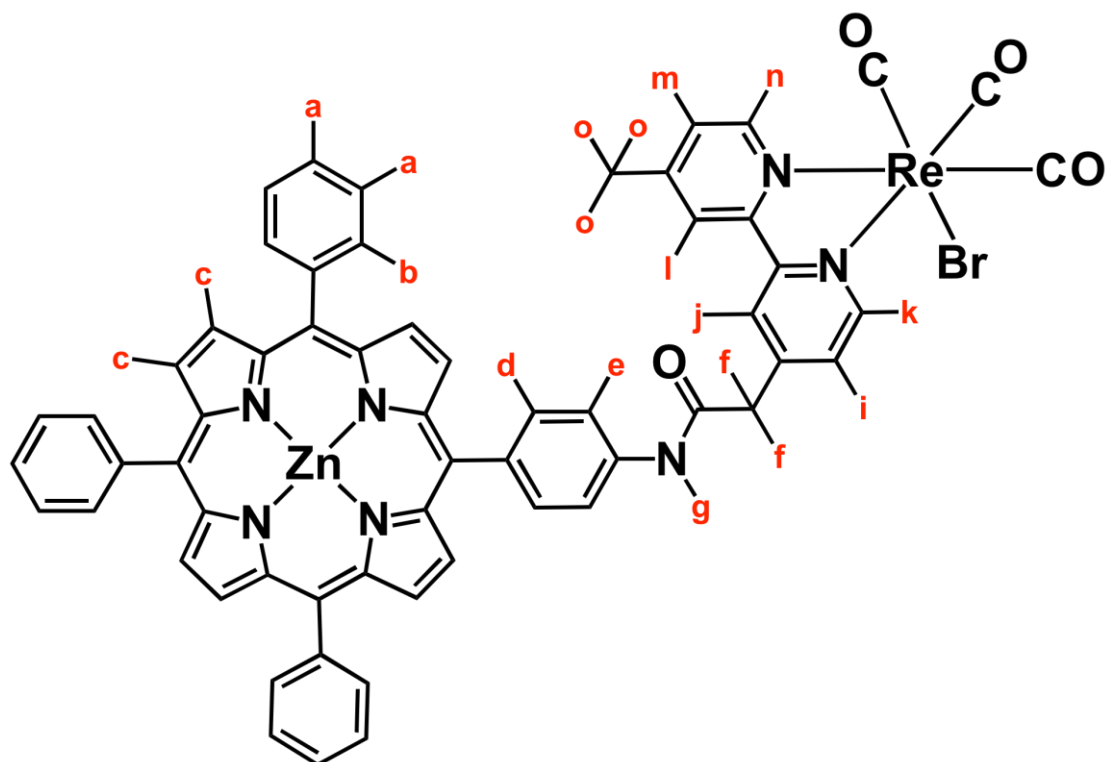

Figure S 1.  $^1\text{H}$  NMR assignment of **Dyad 3 Br**.

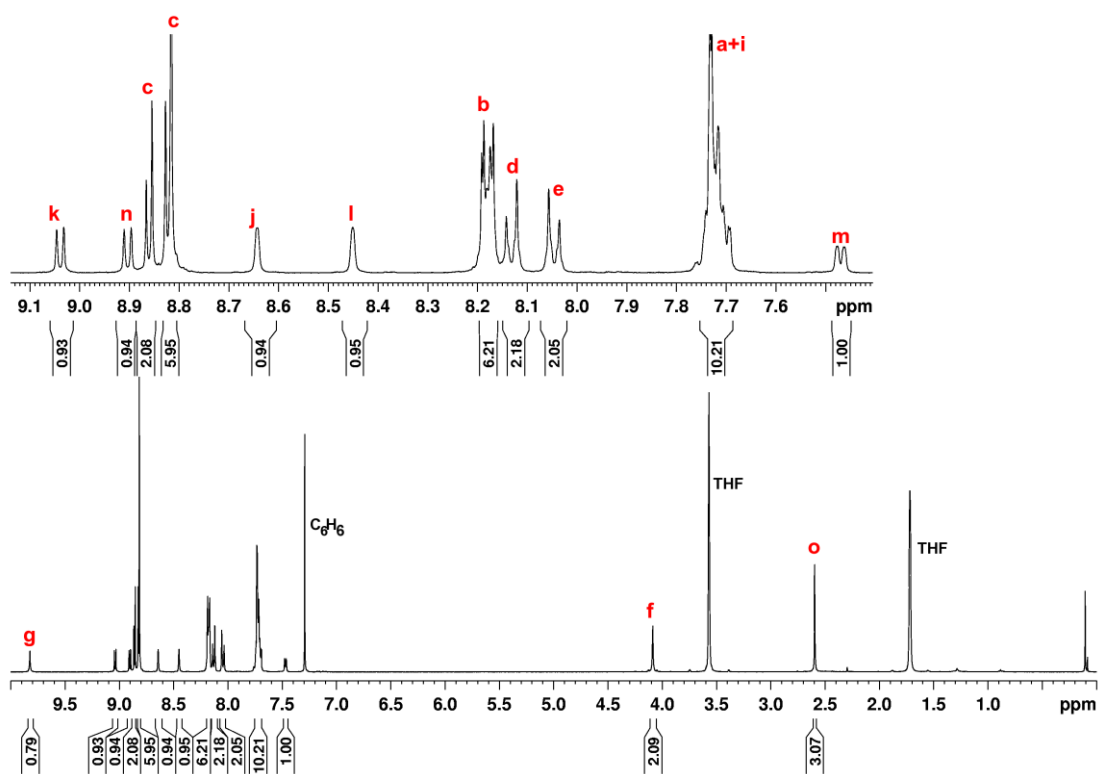

Figure S 2.  $^1\text{H}$  NMR spectrum of **Dyad 3 Br** ( $\text{THF-}d_8$  400 MHz).

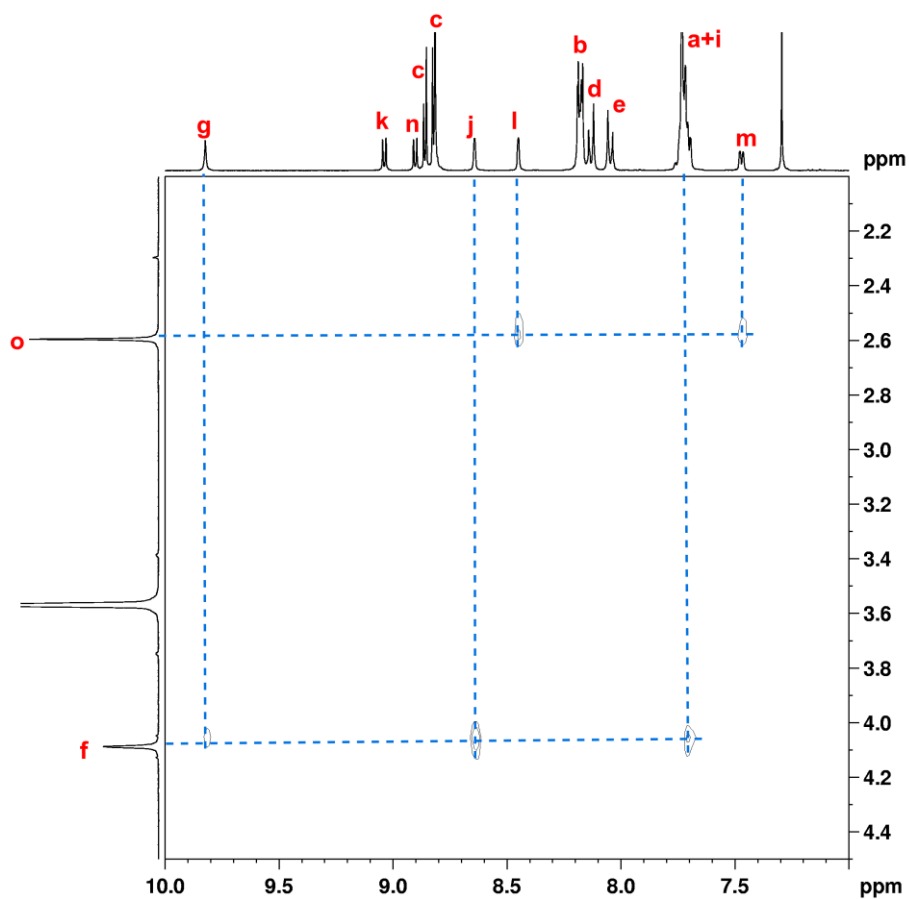

Figure S 3.  $^1\text{H}$ - $^1\text{H}$  NOESY spectrum of **Dyad 3 Br** (THF- $d_8$  400 MHz).

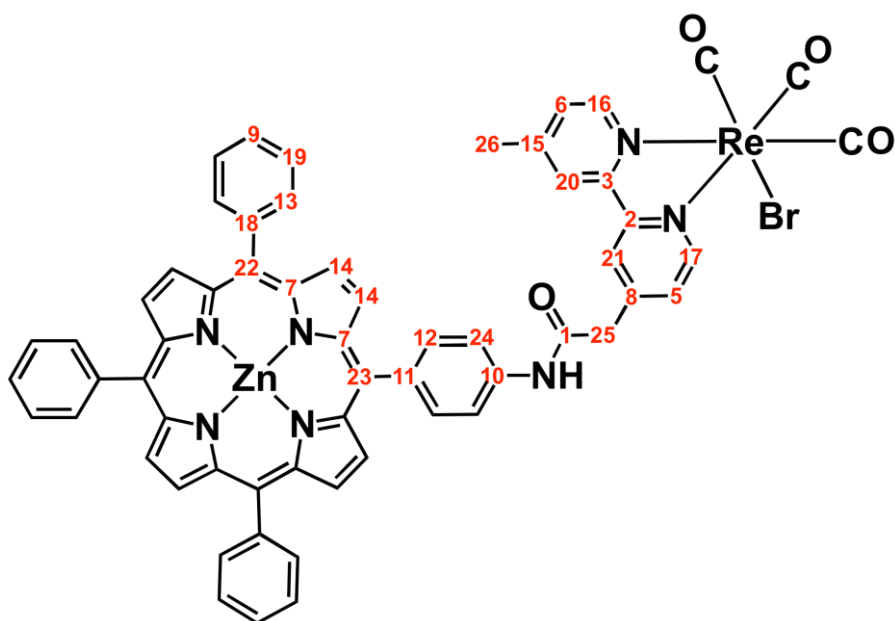

Figure S 4.  $^{13}\text{C}$  NMR assignment of **Dyad 3 Br**.

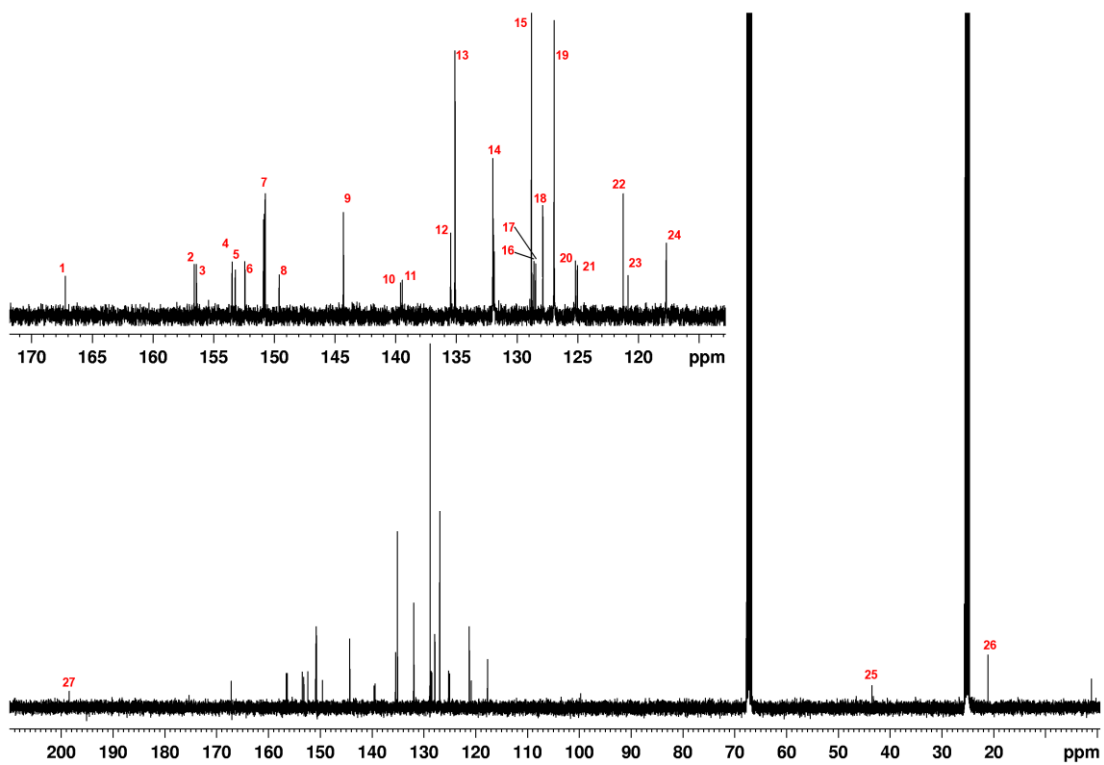

Figure S 5.  $^{13}\text{C}\{^1\text{H}\}$  NMR spectrum of Dyad 3 Br (THF- $d_8$  100.6 MHz).

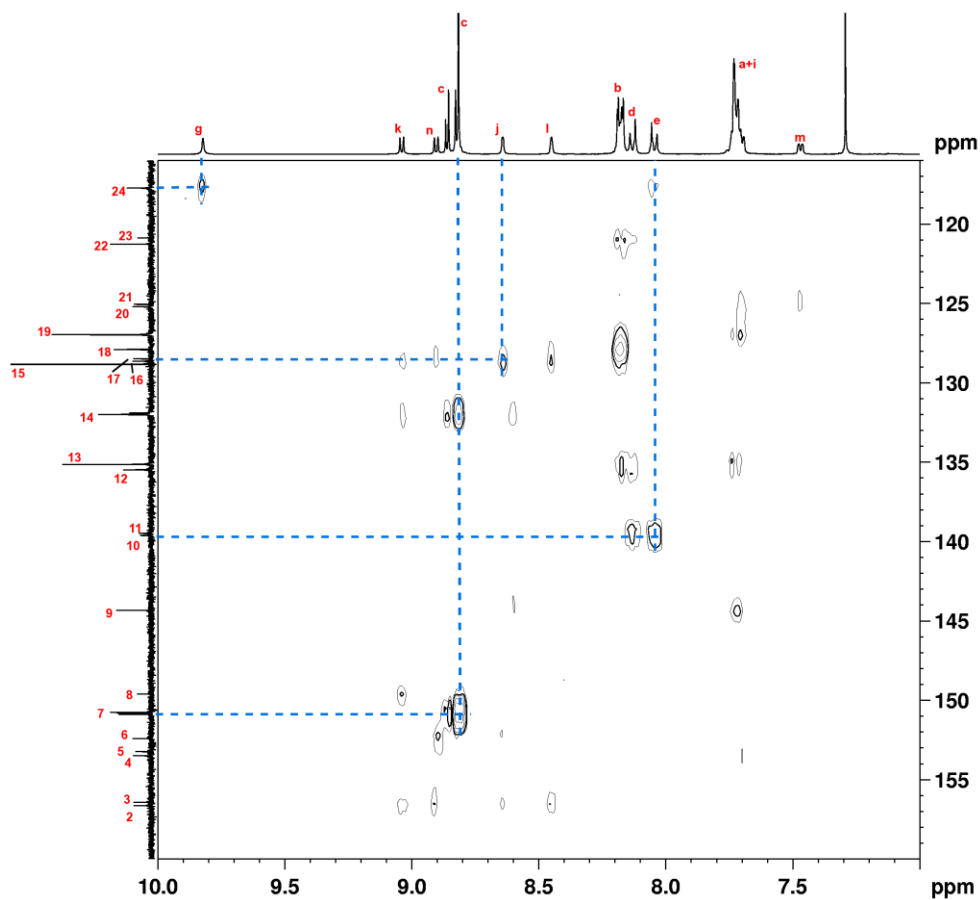

Figure S 6.  $^1\text{H}$ - $^{13}\text{C}$  HMBC NMR spectrum of Dyad 3 Br (THF- $d_8$  400 MHz).

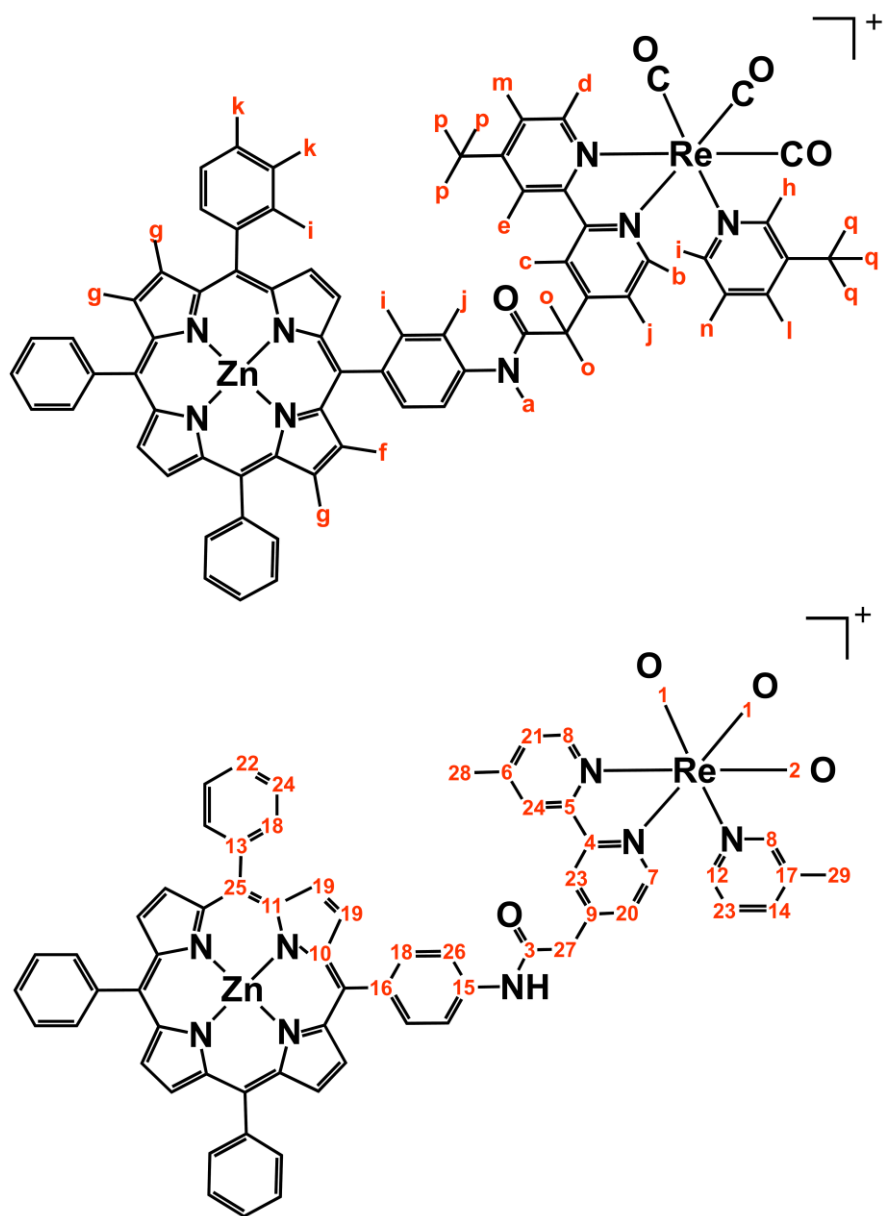

**Figure S 7.**  $^1\text{H}$  (top) and  $^{13}\text{C}$  (bottom) assignment of [Dyad 3 pic]OTf.

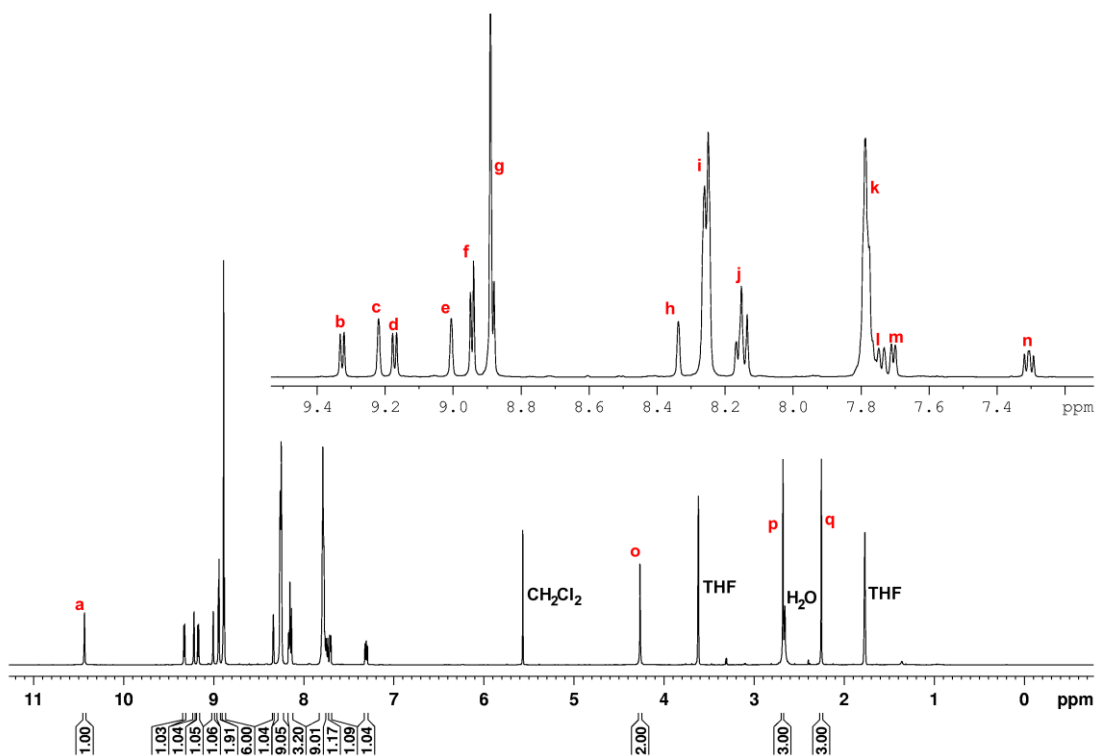

Figure S 8.  $^1\text{H}$  NMR spectrum of [Dyad 3 pic]OTf (THF- $d_8$  400 MHz).

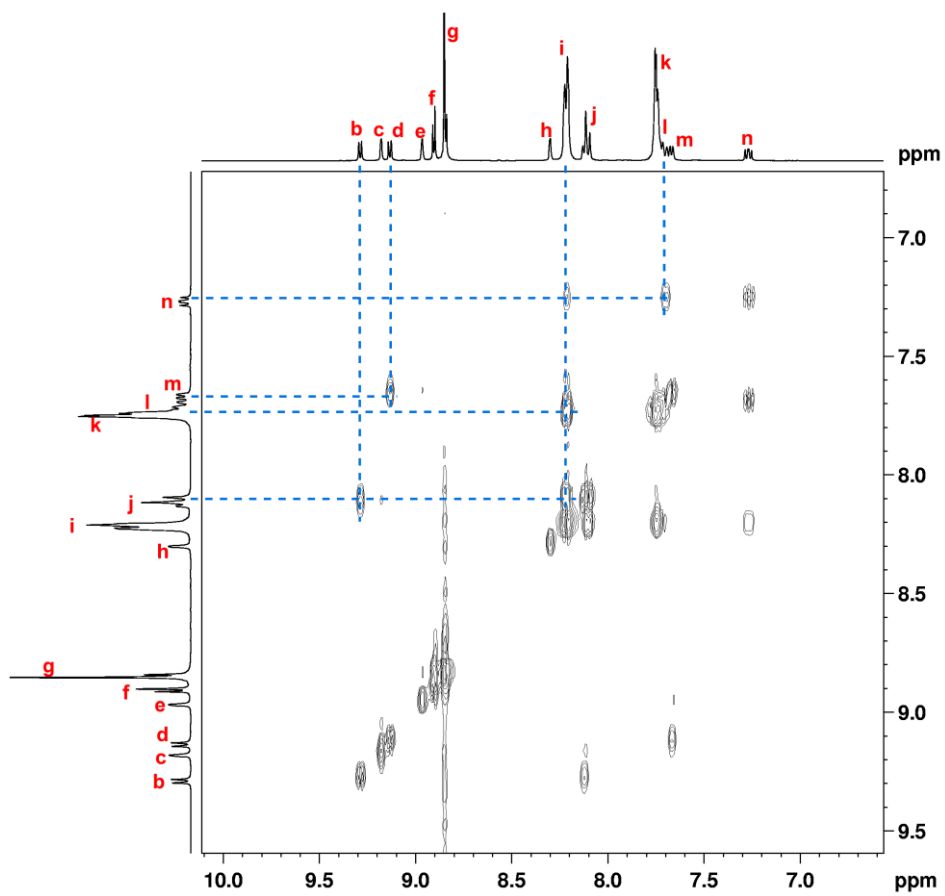

Figure S 9.  $^1\text{H}$ - $^1\text{H}$  COSY spectrum of [Dyad 3 pic]OTf (THF- $d_8$  400 MHz).

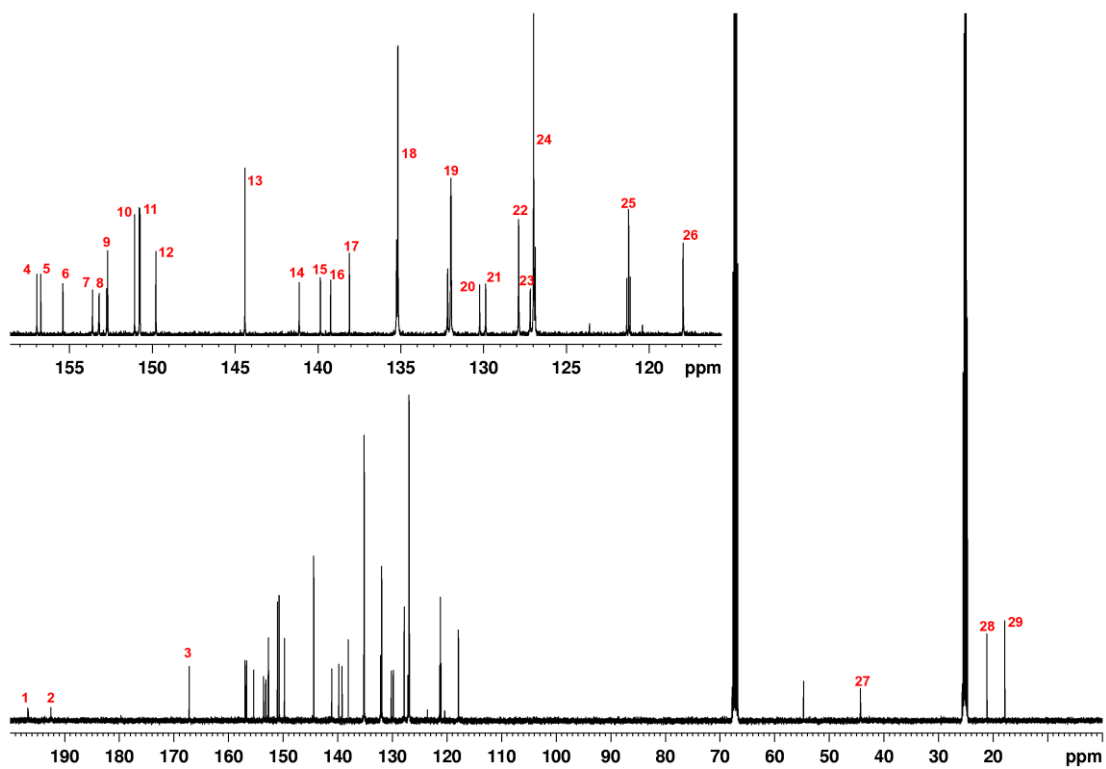

Figure S 10.  $^{13}\text{C}\{^1\text{H}\}$  NMR spectrum of [Dyad 3 pic]OTf (THF- $d_8$  100.6 MHz).

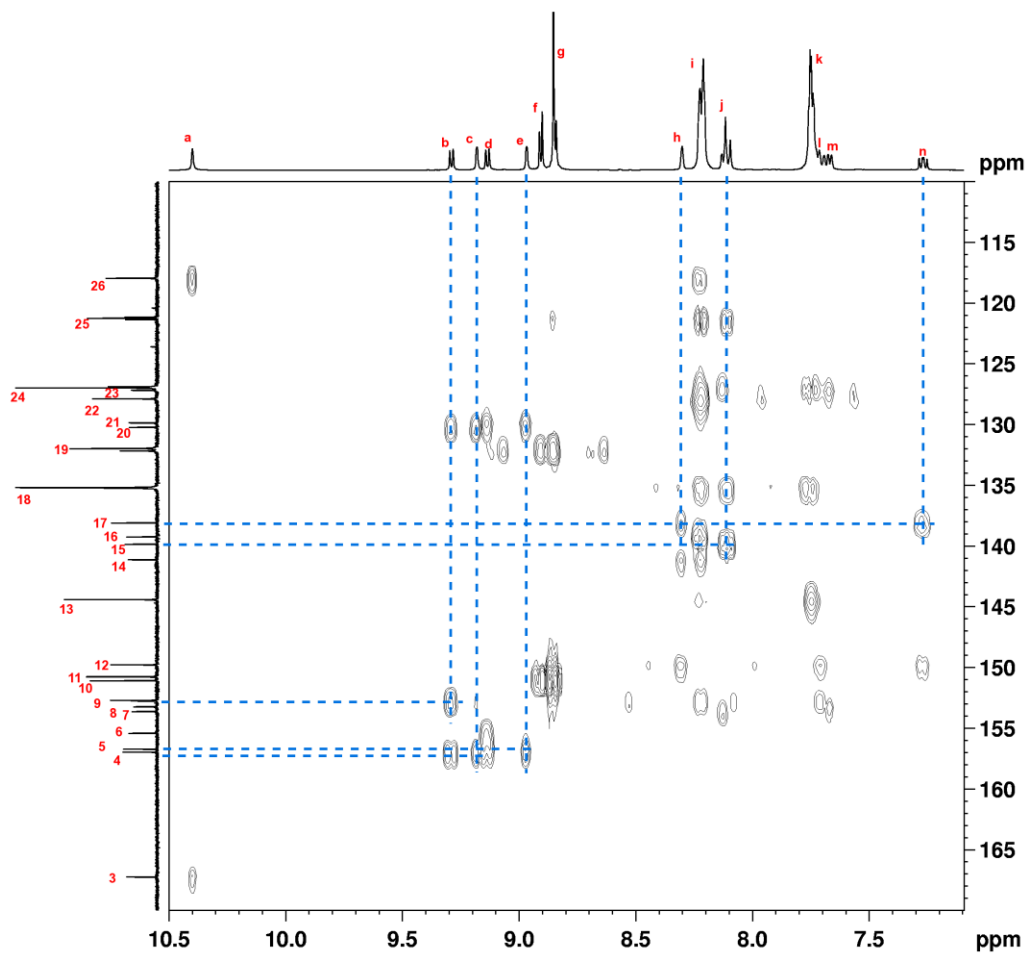

Figure S 11.  $^1\text{H}$ - $^{13}\text{C}$  HMBC NMR spectrum of [Dyad 3 pic]OTf (THF- $d_8$  400 MHz).

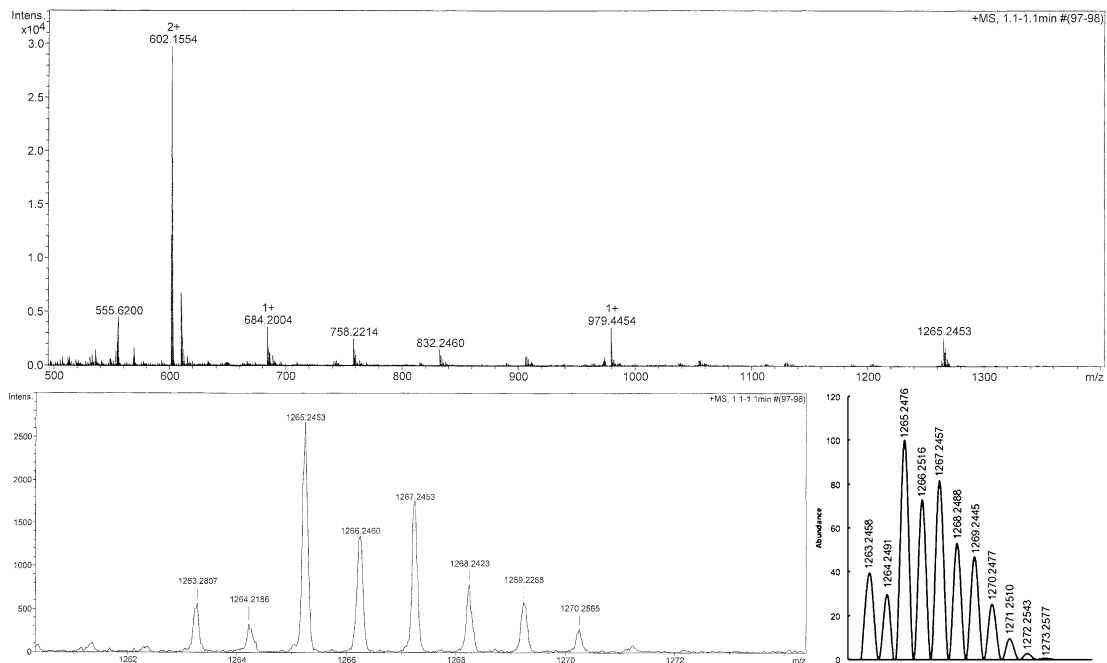

**Figure S 12** ESI-MS of [Dyad 3 pic]OTf: Top is full mass range, bottom left is expansion of  $M^+$ , bottom right is the calculated isotope pattern.



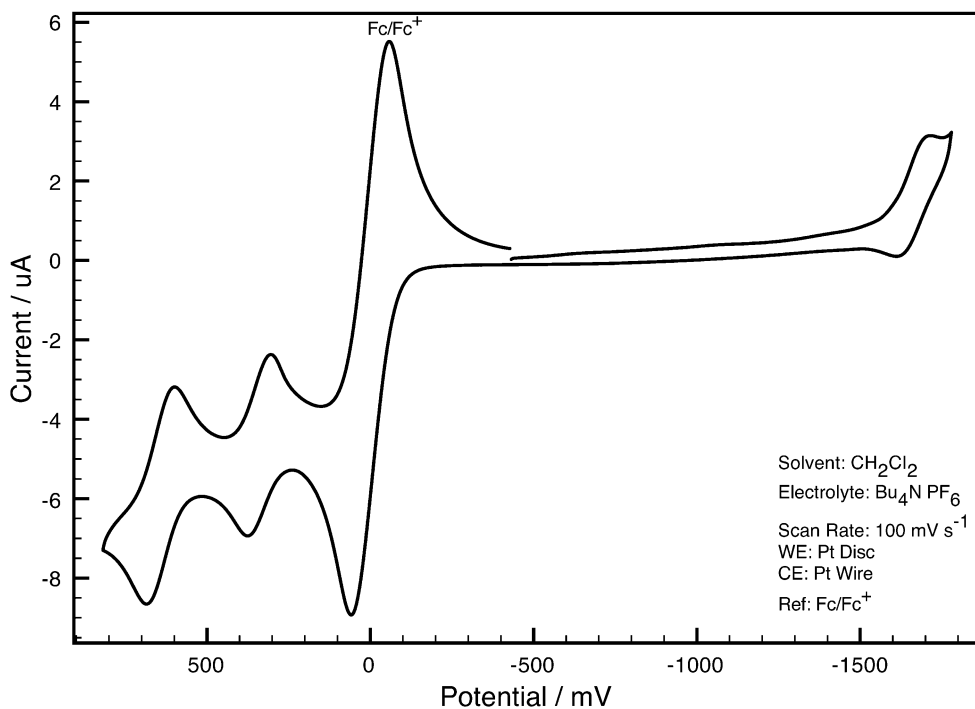

**Figure S 13.** Cyclic voltammogram of [Dyad 3 pic]OTf

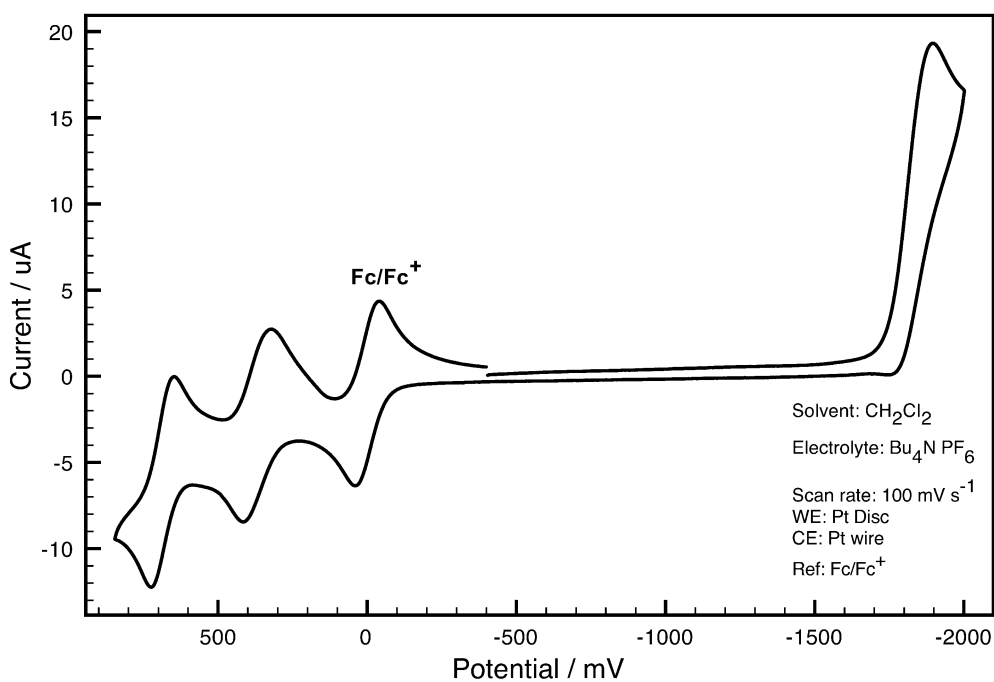

**Figure S 14.** Cyclic voltammogram of Dyad 3 Br

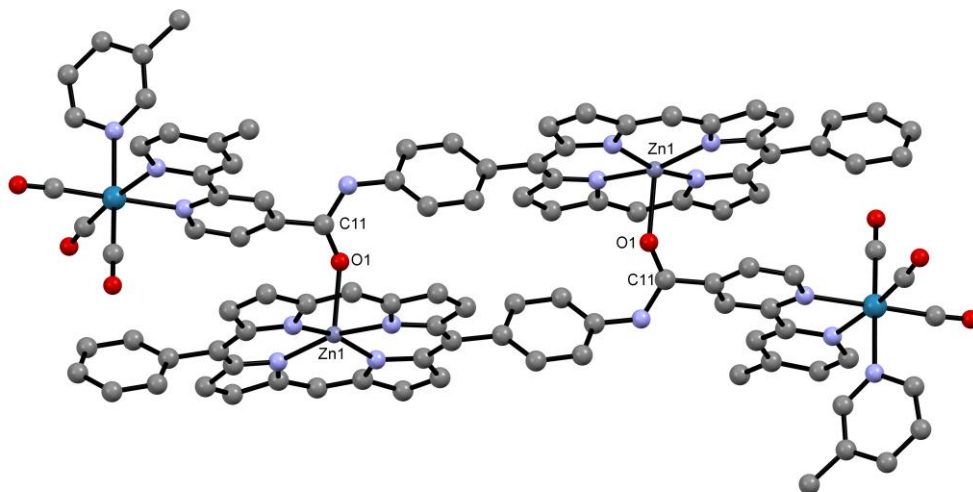

**Figure S 15.** X-ray crystal structure of [Dyad 1 pic]PF<sub>6</sub>. Hydrogen atoms and 2 porphyrin phenyls, PF<sub>6</sub> counterion and solvent of crystallization omitted for clarity. Selected bond length (Å): Zn(1)-O(1): 2.216(4).

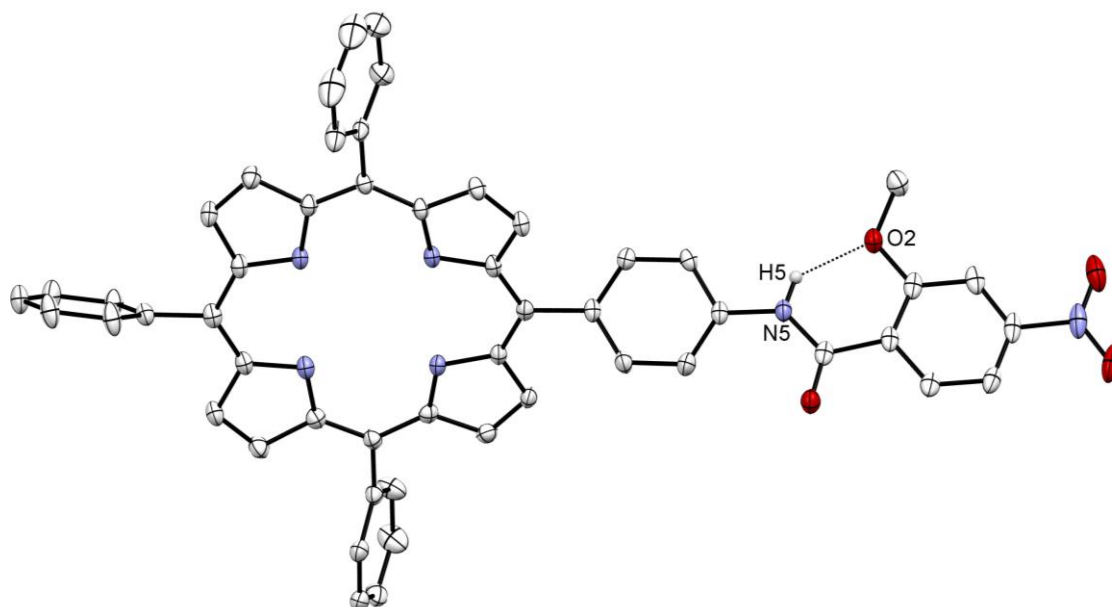

**Figure S 16.** X-ray crystal structure of 5-[4-[(2-methoxy-4-nitro-phenylcarbonyl)-amino]phenyl]-10,15,20-triphenyl porphyrin. Selected hydrogen atoms and solvent of crystallization omitted for clarity. H(5) was located. Thermal ellipsoids shown with probability of 50%. Selected bond length (Å): O(2)-N(5): 2.658(4).

**Table S 1.** Crystallographic data for **[Dyad 1 pic][PF<sub>6</sub>] 2.5 CH<sub>2</sub>Cl<sub>2</sub>**

|                                             |                                                                                                      |
|---------------------------------------------|------------------------------------------------------------------------------------------------------|
| Identification code                         | rnpl309                                                                                              |
| Empirical formula                           | C <sub>67.5</sub> H <sub>49</sub> Cl <sub>5</sub> F <sub>6</sub> N <sub>8</sub> O <sub>4</sub> PReZn |
| Formula weight                              | 1609.94                                                                                              |
| Temperature/K                               | 110.00(10)                                                                                           |
| Crystal system                              | triclinic                                                                                            |
| Space group                                 | P-1                                                                                                  |
| a/Å                                         | 12.9474(5)                                                                                           |
| b/Å                                         | 15.8804(5)                                                                                           |
| c/Å                                         | 17.3277(6)                                                                                           |
| α/°                                         | 98.752(3)                                                                                            |
| β/°                                         | 92.264(3)                                                                                            |
| γ/°                                         | 106.821(3)                                                                                           |
| Volume/Å <sup>3</sup>                       | 3357.4(2)                                                                                            |
| Z                                           | 2                                                                                                    |
| ρ <sub>calc</sub> /mg/mm <sup>3</sup>       | 1.592                                                                                                |
| m/mm <sup>-1</sup>                          | 2.452                                                                                                |
| F(000)                                      | 1602.0                                                                                               |
| Crystal size/mm <sup>3</sup>                | 0.1612 × 0.091 × 0.0831                                                                              |
| 2θ range for data collection                | 5.7 to 54.2°                                                                                         |
| Index ranges                                | -16 ≤ h ≤ 16, -20 ≤ k ≤ 20, -22 ≤ l ≤ 18                                                             |
| Reflections collected                       | 25307                                                                                                |
| Independent reflections                     | 14802[R(int) = 0.0307]                                                                               |
| Data/restraints/parameters                  | 14802/25/880                                                                                         |
| Goodness-of-fit on F <sup>2</sup>           | 1.073                                                                                                |
| Final R indexes [I >= 2σ (I)]               | R <sub>1</sub> = 0.0659, wR <sub>2</sub> = 0.1868                                                    |
| Final R indexes [all data]                  | R <sub>1</sub> = 0.0809, wR <sub>2</sub> = 0.1986                                                    |
| Largest diff. peak/hole / e Å <sup>-3</sup> | 4.12/-1.78                                                                                           |
| CCDC number                                 | 1406001                                                                                              |

**Table S 2. Crystallographic data for 5-[4-[(2-methoxy-4-nitro-phenylcarbonyl)-amino]phenyl]-10,15,20-triphenyl porphyrin **0.595 CH<sub>2</sub>Cl<sub>2</sub>****

|                                             |                                                                                               |
|---------------------------------------------|-----------------------------------------------------------------------------------------------|
| Empirical formula                           | C <sub>52.59375</sub> H <sub>37.1875</sub> Cl <sub>1.1875</sub> N <sub>6</sub> O <sub>4</sub> |
| Formula weight                              | 859.29                                                                                        |
| Temperature/K                               | 110.00(10)                                                                                    |
| Crystal system                              | orthorhombic                                                                                  |
| Space group                                 | Fddd                                                                                          |
| a/Å                                         | 23.5964(4)                                                                                    |
| b/Å                                         | 37.3470(6)                                                                                    |
| c/Å                                         | 40.0789(6)                                                                                    |
| α/°                                         | 90.00                                                                                         |
| β/°                                         | 90.00                                                                                         |
| γ/°                                         | 90.00                                                                                         |
| Volume/Å <sup>3</sup>                       | 35319.7(9)                                                                                    |
| Z                                           | 32                                                                                            |
| ρ <sub>calc</sub> /mg/mm <sup>3</sup>       | 1.293                                                                                         |
| m/mm <sup>-1</sup>                          | 0.152                                                                                         |
| F(000)                                      | 14303.4                                                                                       |
| Crystal size/mm <sup>3</sup>                | 0.1818 × 0.1617 × 0.1159                                                                      |
| 2θ range for data collection                | 5.76 to 50.7°                                                                                 |
| Index ranges                                | -25 ≤ h ≤ 28, -44 ≤ k ≤ 44, -45 ≤ l ≤ 48                                                      |
| Reflections collected                       | 26924                                                                                         |
| Independent reflections                     | 8081[R(int) = 0.0340]                                                                         |
| Data/restraints/parameters                  | 8081/6/606                                                                                    |
| Goodness-of-fit on F <sup>2</sup>           | 1.035                                                                                         |
| Final R indexes [I >= 2σ (I)]               | R <sub>1</sub> = 0.0578, wR <sub>2</sub> = 0.1587                                             |
| Final R indexes [all data]                  | R <sub>1</sub> = 0.0712, wR <sub>2</sub> = 0.1693                                             |
| Largest diff. peak/hole / e Å <sup>-3</sup> | 0.85/-1.07                                                                                    |
| CCDC number                                 | 1406000                                                                                       |

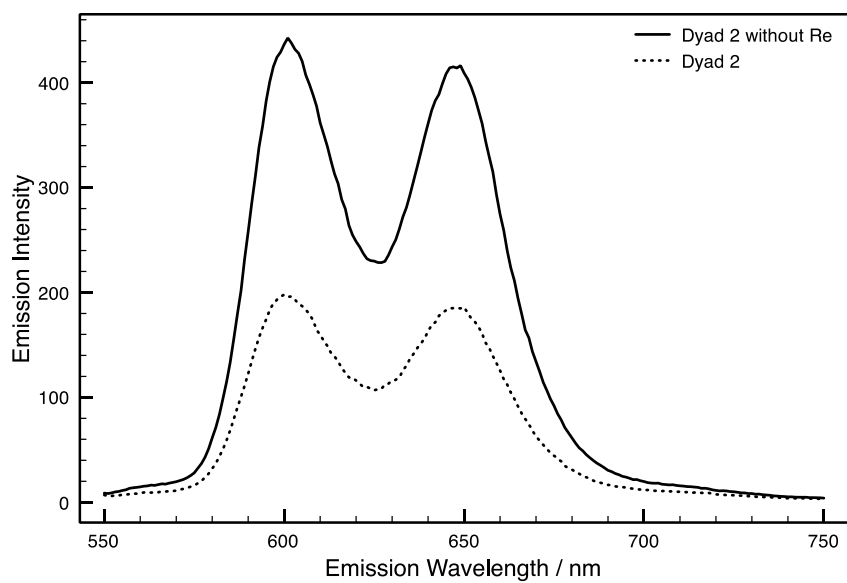

**Figure S 17.** Emission spectra of **[Dyad 2 pic]OTf** and the Zn porphyrin-bridge-bipyridine ligand of Dyad 2.

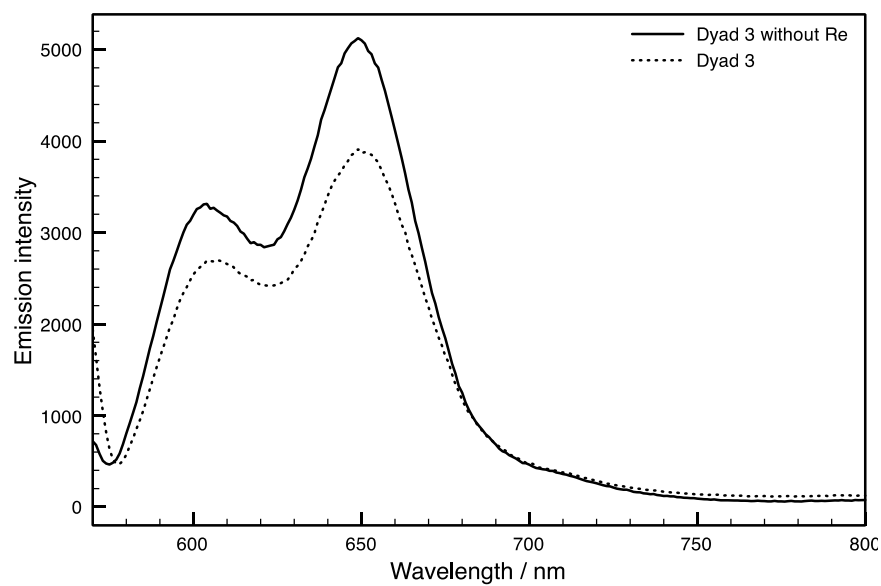

**Figure S 18.** Emission spectra of **[Dyad 3 pic]OTf** and the Zn porphyrin-bridge-bipyridine ligand of Dyad 3.

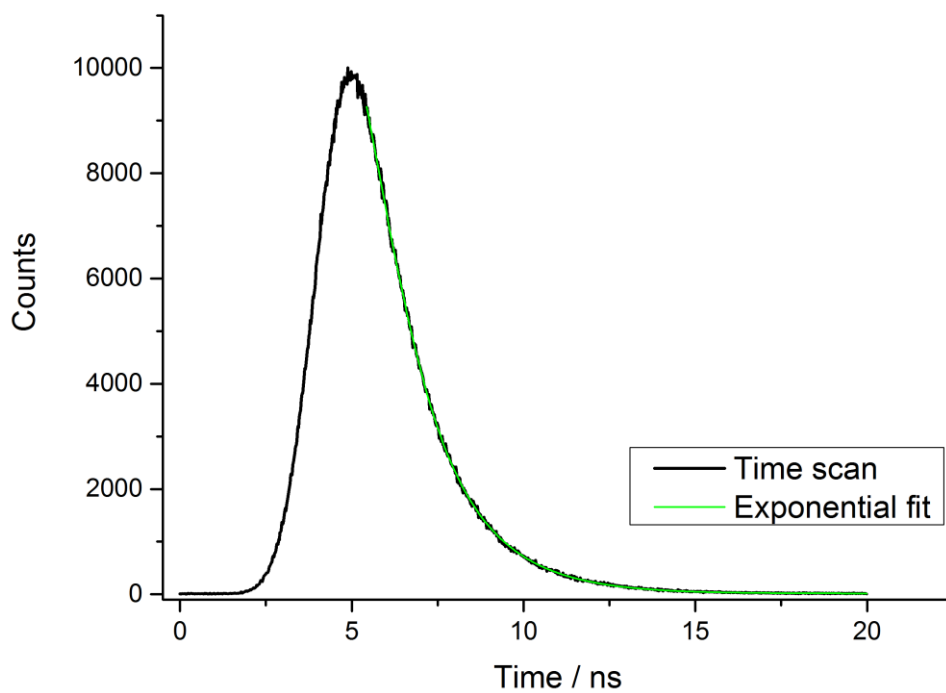

**Figure S 19.** Emission time scan (black) and fitting (green) for **[Dyad 3 pic]OTf**.  $\lambda_{\text{ex}} = 560 \text{ nm}$  and  $\lambda_{\text{em}} = 605 \text{ nm}$ .

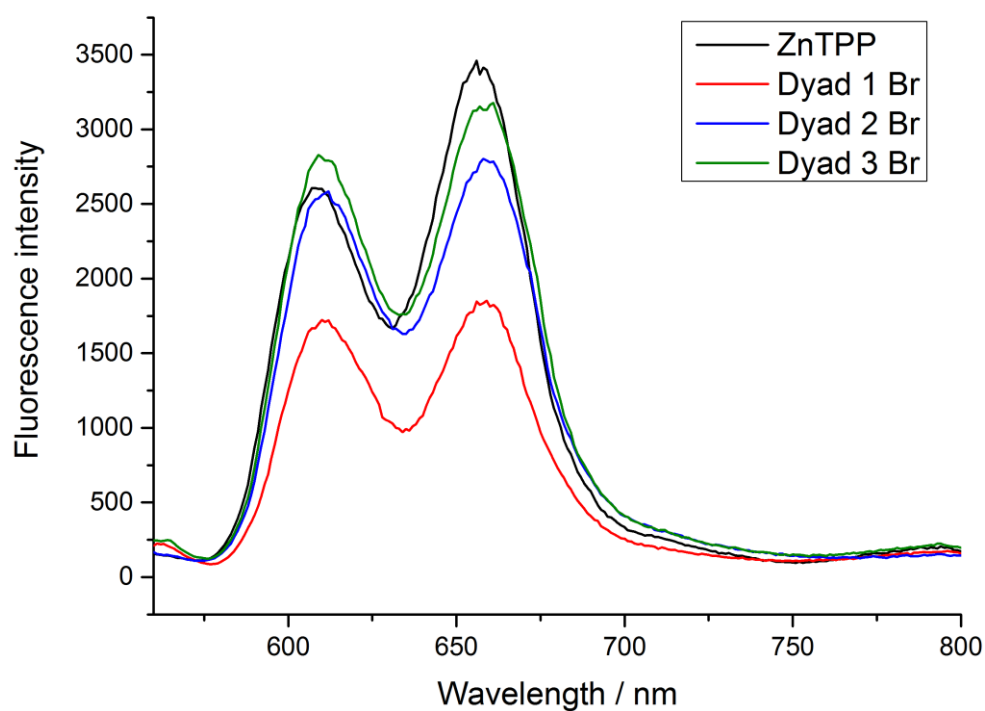

**Figure S 20.** Emission spectra of **ZnTPP**, **Dyad 1 Br**, **Dyad 2 Br** and **Dyad 3 Br** in THF.

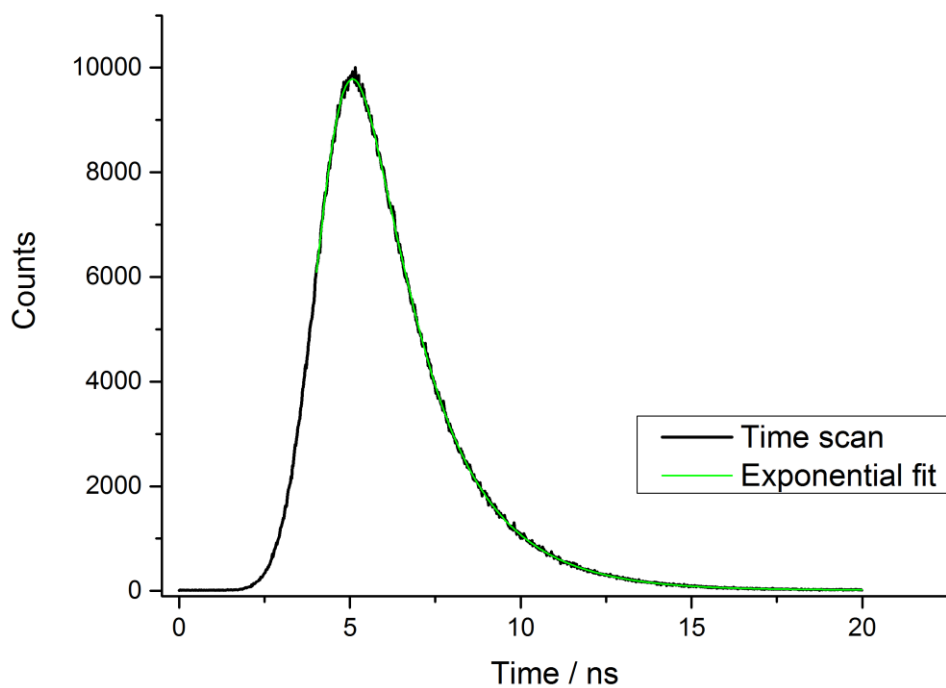

**Figure S 21.** Emission time scan (black) and fitting (green) for **Dyad 3 Br**.  $\lambda_{\text{ex}} = 560$  nm and  $\lambda_{\text{em}} = 605$  nm.

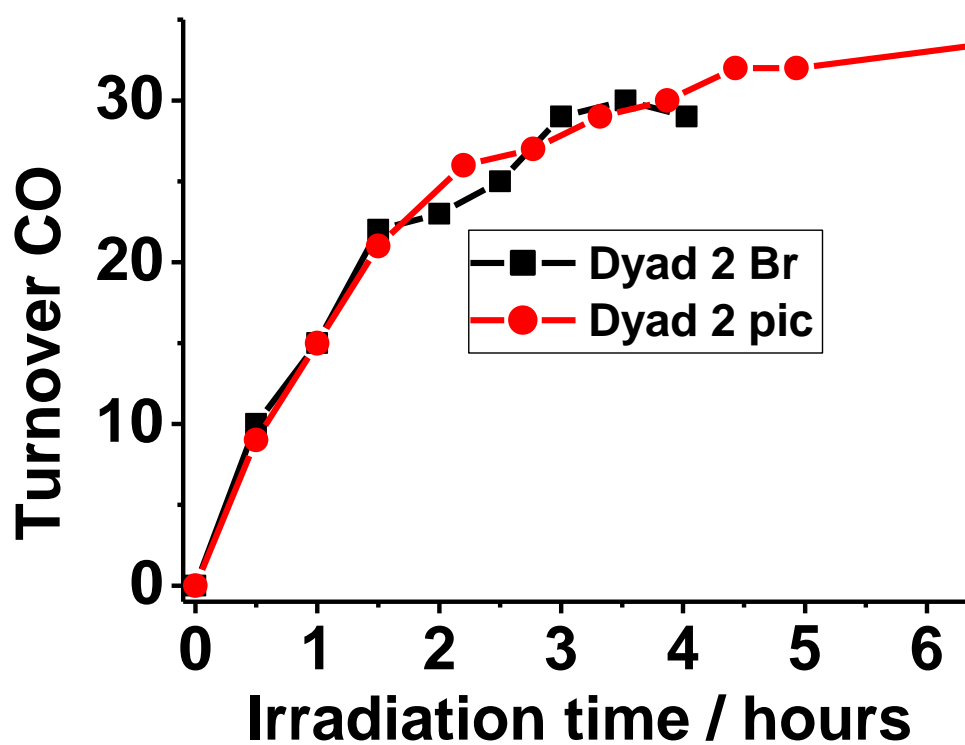

**Figure S 22.**  $\text{TON}_{\text{CO}}$  for **Dyad 2 Br** and **[Dyad 2 pic]OTf**. In DMF:TEOA 5:1 and with  $\lambda > 520$  nm irradiation.

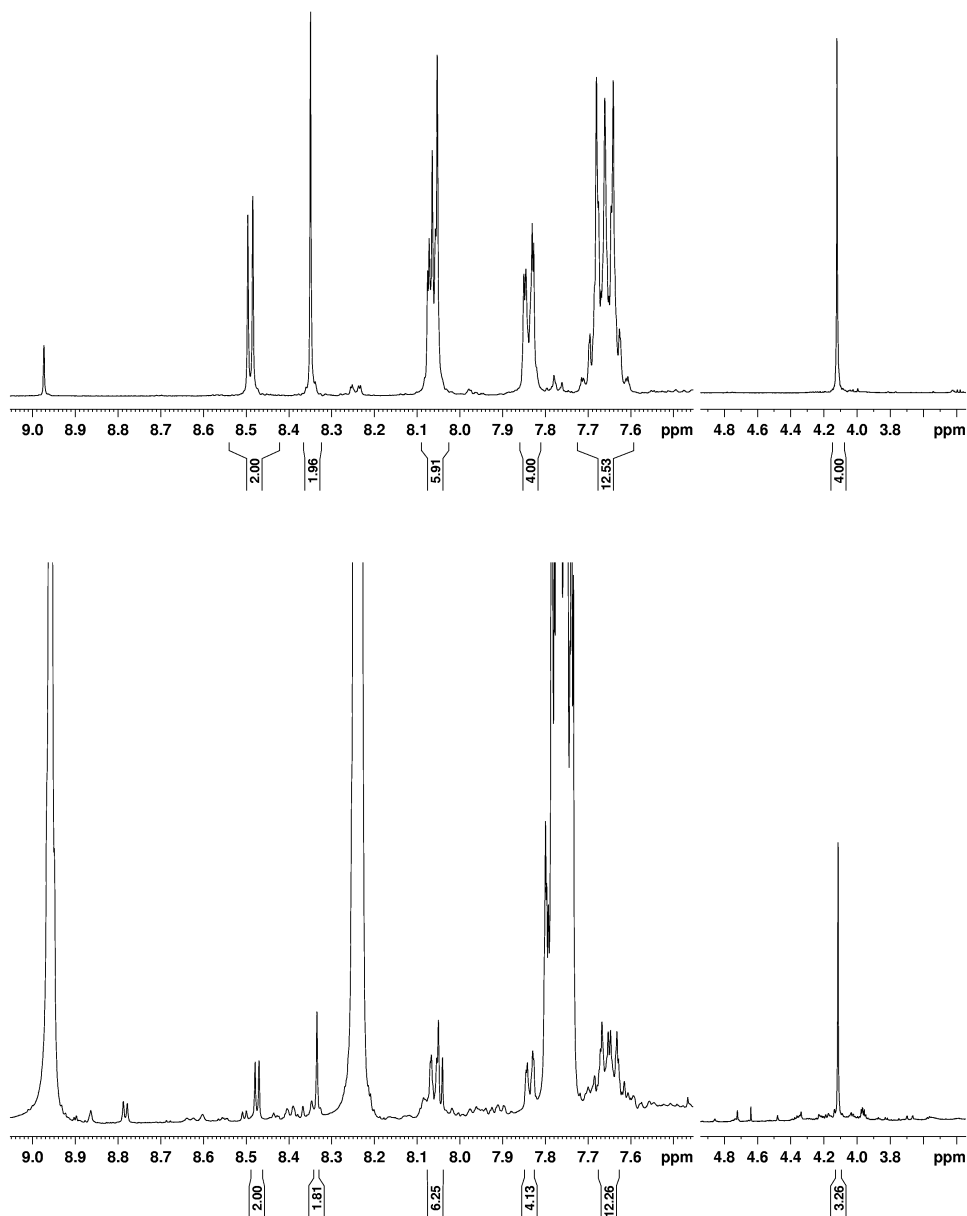

**Figure S 23**  $^1\text{H}$  NMR spectra. Above: authentic zinc tetraphenylchlorin, below: photoreaction mixture of ZnTPP in DMF:TEOA 5:1.

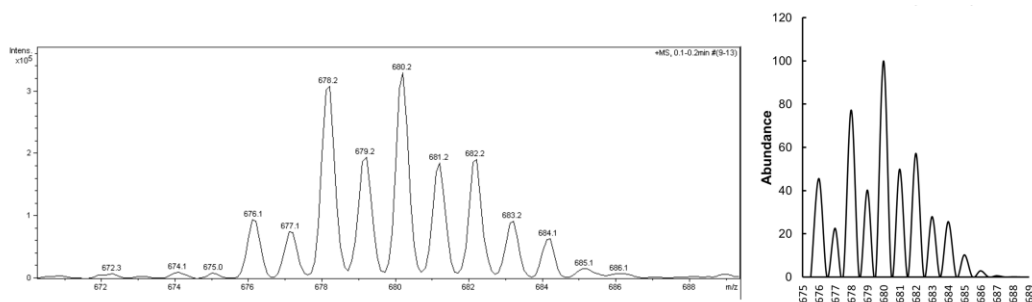

**Figure S 24.** Left: ESI-MS of ZnTPP in DMF/TEOA after irradiation with  $\lambda > 520$  nm, right: calculated isotope pattern for ZnTPP, Zn chlorin and Zn isobacteriochlorin superimposed on top of one another in a 1:1:1 ratio.



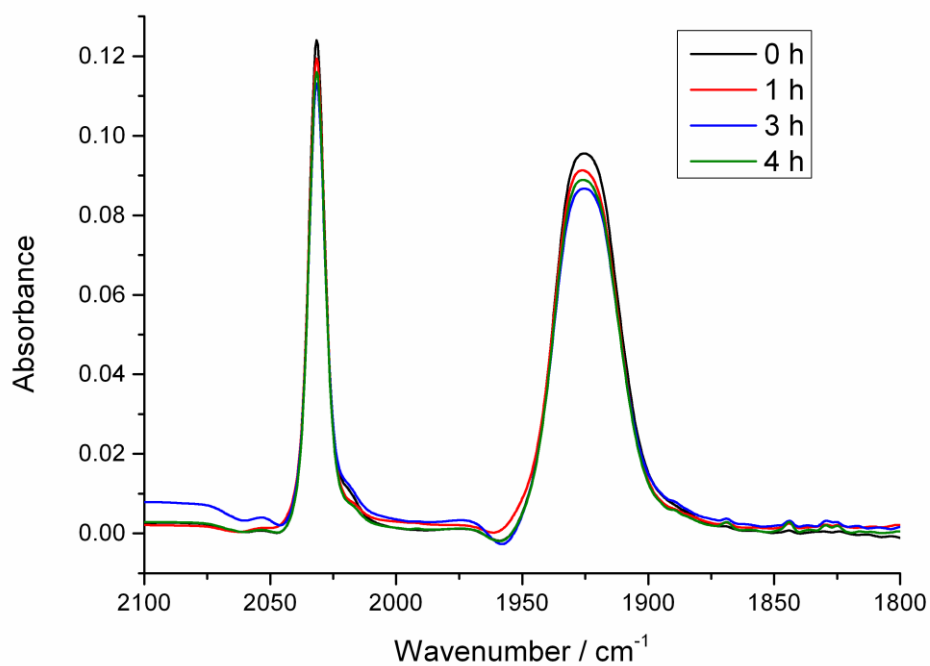

**Figure S 25.** IR spectra of [Dyad 2 pic]OTf following dissolution in DMF at times given.

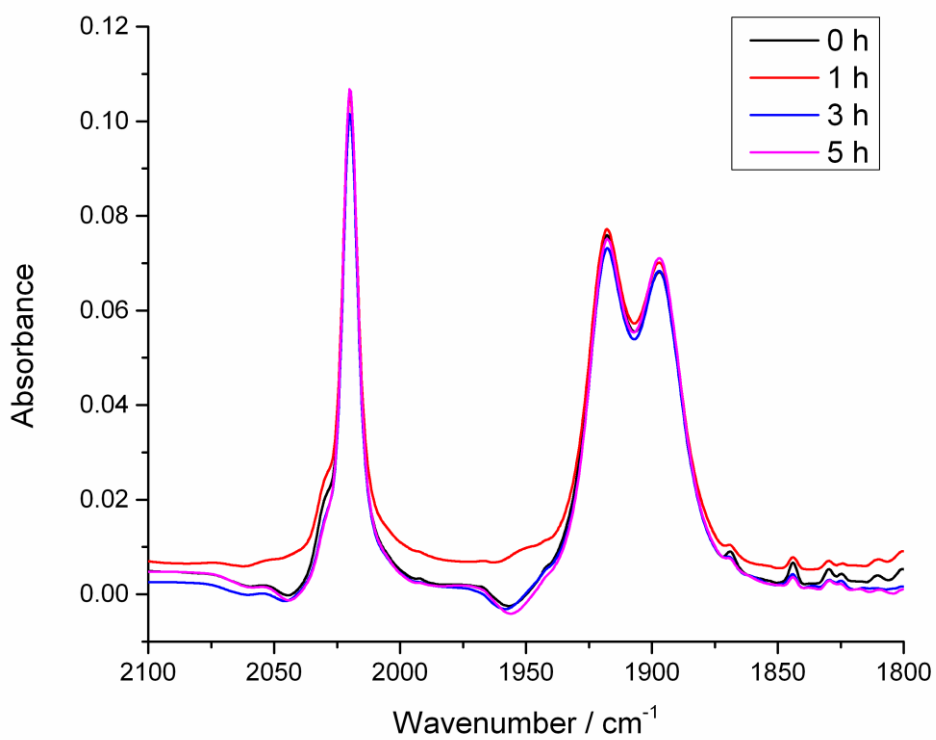

**Figure S 26.** IR spectra of Dyad 2 Br following dissolution in DMF at times given.

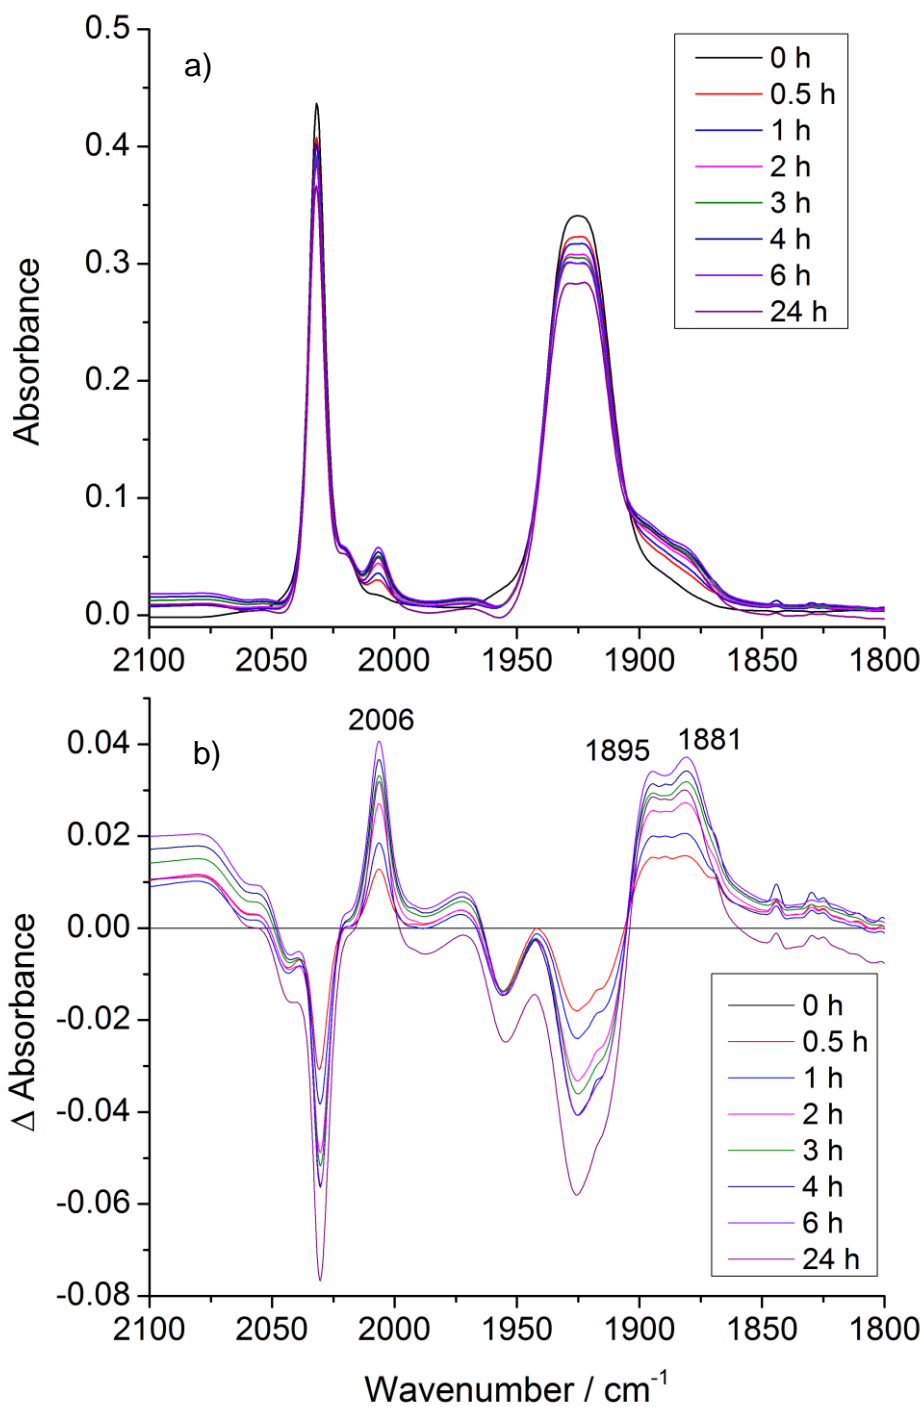

**Figure S 27.** IR spectra of [Dyad 2 pic]OTf in DMF after addition of TEOA (DMF:TEOA 5:1): a) absorption spectra at times after addition of TEOA, b) difference spectra at same times.

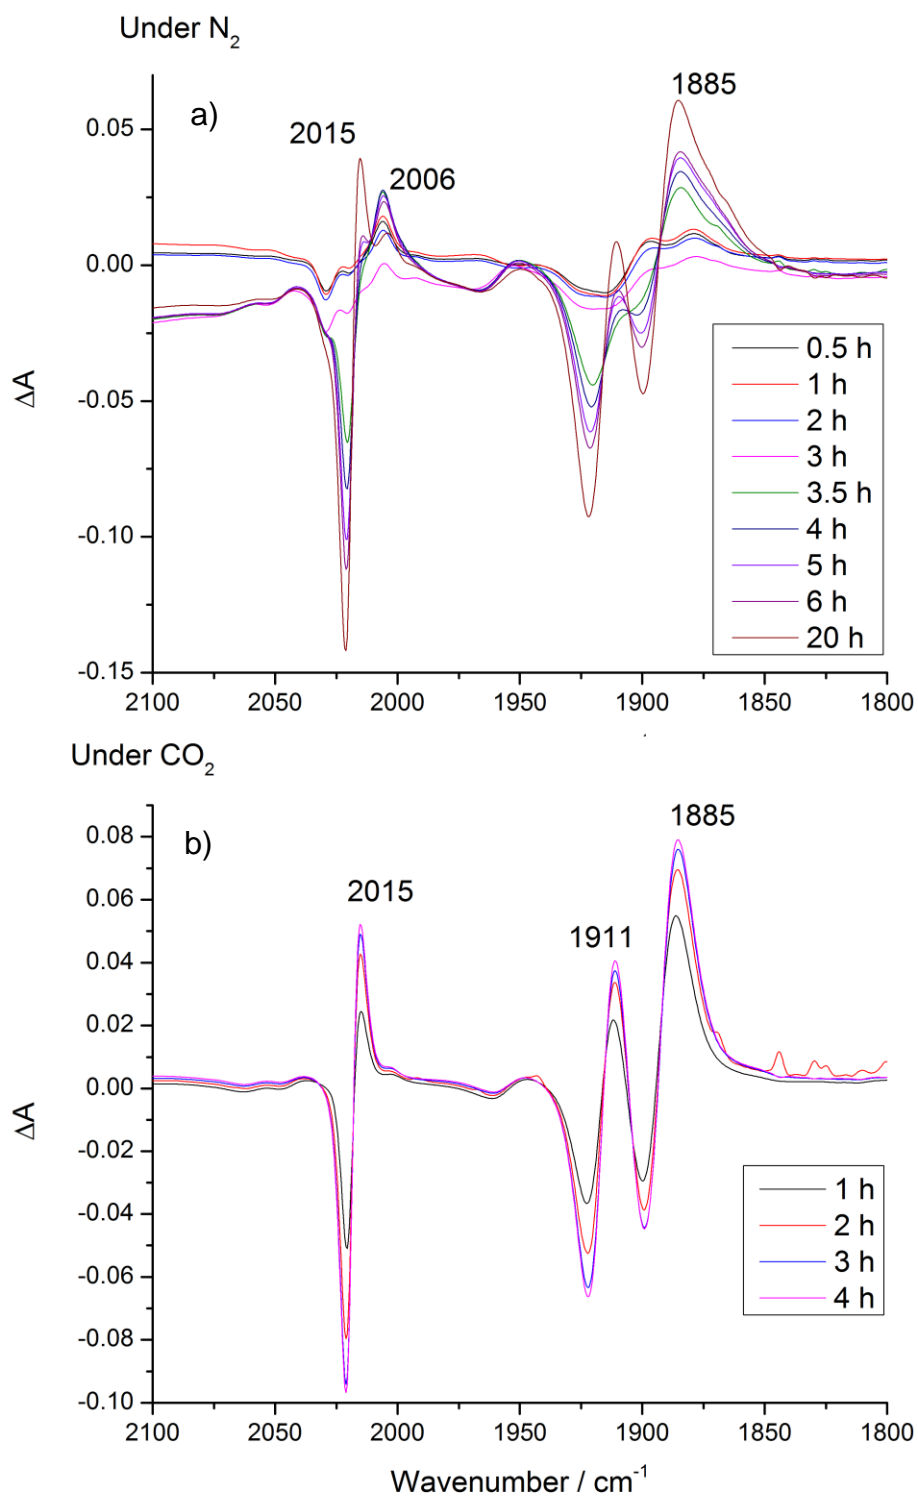

**Figure S 28.** IR difference spectra of **Dyad 2 Br** in DMF after addition of TEOA (DMF:TEOA 5:1) and with  $\lambda > 520$  nm irradiation relative to before addition of TEOA: a) under  $\text{N}_2$ , b) same sample following bubbling of  $\text{CO}_2$ .

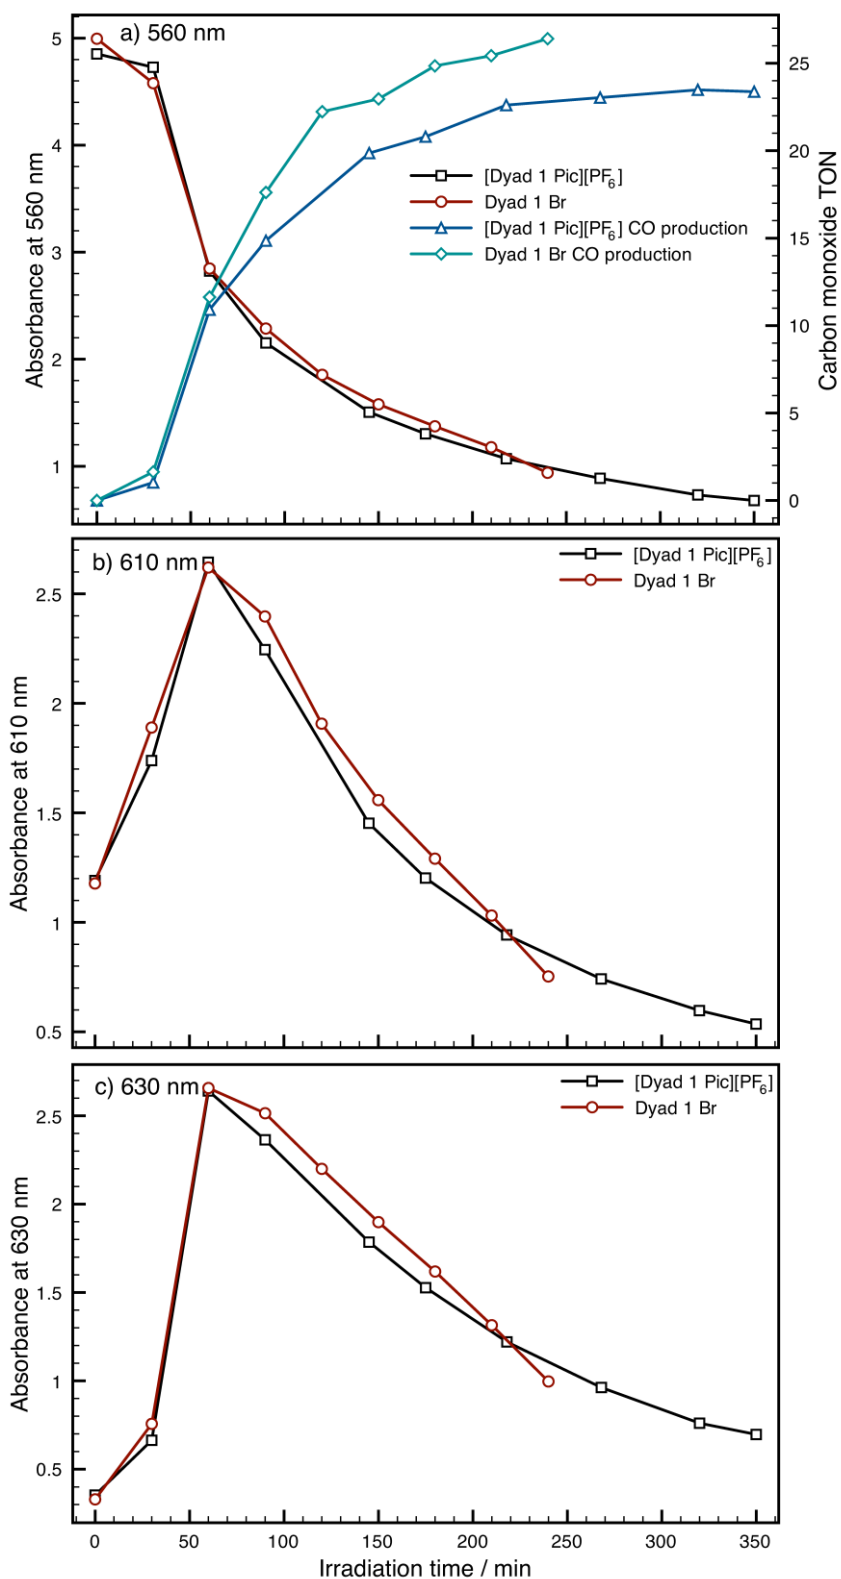

**Figure S 29.** Absorbance changes in the UV/vis spectra of **Dyad 1 Br** and **[Dyad 1 pic]PF<sub>6</sub>** during CO<sub>2</sub> reduction: a) changes in signal intensity at 560 nm and turnovers of CO, b) changes in signal intensity at 610 nm, c) changes in signal intensity at 630 nm.
